# Supplementary material
Source: MDPI journal article supplement (https://www.mdpi.com/2075-163X/12/10/1299)
Supplement: s1 [file s1]

### **Supplementary material**

Lipid biomarker and stable isotopic profiles through Later carboniferous – Early Triassic of the deepest Well MS-1 in the Junggar Basin, northwest China

**Shuncun Zhang<sup>1,3</sup>, Tao Wang<sup>1,3</sup>, Hui Guo<sup>1,3</sup>, Shengyin Zhang<sup>1,3</sup> Bo Chen<sup>2,\*</sup>**

<sup>1</sup> Northwest Institute of Eco-Environment and Resources, Chinese Academy of Sciences, Lanzhou 730000, China

<sup>2</sup> Guangxi Key Laboratory of Green Chemical Materials and Safety Technology, Beibu Gulf University, Qinzhou 515000, China

<sup>3</sup> Key Laboratory of Petroleum Resources, Gansu, Lanzhou 730000, PR China

\* Correspondence: cbo-11@163.com

**The following supplementary material is available for this article online:**

Table S1 TOC and rock pyrolysis parameters of the Late Carboniferous-Early Triassic rocks in MS-1 well

Table S2 Parameters of  $\delta^{13}\text{C}$  values of n-alkanes, Pr, Ph,  $\beta$ -carotene and chloroform extracts from MS1 wells of the Late Carboniferous-Early

Table S3 Parameters of hopane and sterane in Late Carboniferous-Early Triassic of MS1 well

Table S1 TOC and rock pyrolysis parameters of the Late Carboniferous-Early Triassic rocks in MS-1 well

| Strata          | Sample No. | Depth<br>(m) | Lithology                | TOC<br>(%) | S <sub>1</sub> +S <sub>2</sub><br>(mg/g) | T <sub>max</sub><br>°C |
|-----------------|------------|--------------|--------------------------|------------|------------------------------------------|------------------------|
| T <sub>1b</sub> | JM-1       | 5951.00      | Gray mudstone            | 0.64       | 1.26                                     | 439                    |
|                 | JM-2       | 5982.67      | Brown siltstone mudstone | 0.17       | 0.15                                     | 507                    |
|                 | JM-3       | 5983.15      | Brown siltstone mudstone | 0.15       | 0.12                                     | 482                    |
|                 | JM-4       | 5990.00      | Gray mudstone            | 0.6        | 1.51                                     | 439                    |
|                 | JM-5       | 6011.00      | Gray mudstone            | 0.62       | 1.7                                      | 441                    |
|                 | JM-6       | 6046.00      | Gray mudstone            | 0.5        | 1.27                                     | 439                    |
|                 | JM-7       | 6078.00      | Gray mudstone            | 0.63       | 1.56                                     | 438                    |
|                 | JM-8       | 6114.00      | Gray mudstone            | 0.77       | 2.47                                     | 446                    |
|                 | JM-9       | 6169.00      | Gray mudstone            | 0.62       | 2.83                                     | 437                    |
| P <sub>3w</sub> | JM-10      | 6193.00      | Gray-brown mudstone      | 0.64       | 2.34                                     | 436                    |
|                 | JM-11      | 6227.00      | Gray-brown mudstone      | 0.46       | 0.99                                     | 440                    |
|                 | JM-12      | 6246.00      | Gray-brown mudstone      | 0.44       | 0.54                                     | 442                    |
|                 | JM-13      | 6274.00      | Gray mudstone            | 0.92       | 3.41                                     | 440                    |
|                 | JM-14      | 6301.00      | Brown siltstone mudstone | 0.63       | 1.52                                     | 443                    |
|                 | JM-15      | 6322.00      | Brown siltstone mudstone | 0.62       | 1.84                                     | 433                    |
|                 | JM-16      | 6333.00      | Brown siltstone mudstone | 0.46       | 0.79                                     | 428                    |

|                 |       |         |                          |      |      |     |
|-----------------|-------|---------|--------------------------|------|------|-----|
| P <sub>2w</sub> | JM-17 | 6379.00 | Brown siltstone mudstone | 0.37 | 0.57 | 453 |
|                 | JM-18 | 6393.00 | Gray mudstone            | 0.38 | 1.03 | 431 |
|                 | JM-19 | 6407.00 | Gray mudstone            | 1.21 | 1.74 | 434 |
|                 | JM-20 | 6435.00 | Brown siltstone mudstone | 0.72 | 1.04 | 436 |
|                 | JM-21 | 6459.00 | Gray mudstone            | 0.94 | 1.59 | 432 |
|                 | JM-22 | 6476.00 | Gray mudstone            | 0.91 | 3.16 | 407 |
|                 | JM-23 | 6486.00 | Gray mudstone            | 0.75 | 1.36 |     |
|                 | JM-24 | 6492.00 | Gray mudstone            | 0.18 | 1.25 | 425 |
|                 | JM-25 | 6513.00 | Gray mudstone            | 0.61 | 0.86 | 423 |
|                 | JM-26 | 6531.00 | Gray mudstone            | 0.73 | 0.96 | 413 |
|                 | JM-27 | 6543.86 | Gray mudstone            | 0.69 | 0.38 | 471 |
|                 | JM-28 | 6545.1  | Brown siltstone mudstone | 0.64 | 0.29 | 483 |
|                 | JM-29 | 6553.00 | Gray mudstone            | 0.74 | 0.63 | 424 |
|                 | JM-30 | 6568.00 | Gray mudstone            | 0.55 | 0.54 | 396 |
|                 | JM-31 | 6591.00 | Gray mudstone            | 0.64 | 0.7  | 463 |
|                 | JM-32 | 6632.00 | Gray mudstone            | 0.33 | 1.01 | 411 |
| P <sub>2x</sub> | JM-33 | 6642.00 | Gray mudstone            | 0.59 | 0.63 | 425 |
|                 | JM-34 | 6668.00 | Gray mudstone            | 0.05 | 0.26 | 445 |
|                 | JM-35 | 6680.00 | Brown siltstone mudstone | 0.55 | 0.19 |     |

|                 |       |         |                          |       |       |     |
|-----------------|-------|---------|--------------------------|-------|-------|-----|
|                 | JM-36 | 6703.00 | Gray mudstone            | 0.46  | 0.29  | 458 |
|                 | JM-37 | 6728.00 | Gray mudstone            | 1.16  | 0.65  | 439 |
|                 | JM-38 | 6750.00 | Brown siltstone mudstone | 0.24  | 0.15  | 463 |
|                 | JM-39 | 6766.00 | Brown siltstone mudstone | 0.21  | 0.14  | 458 |
|                 | JM-40 | 6790.00 | Gray mudstone            | 0.88  | 0.96  | 437 |
|                 | JM-41 | 6800.00 | Gray mudstone            | 0.42  | 0.27  | 468 |
| C <sub>2t</sub> | JM-42 | 6820.00 | Gray-brown mudstone      | 0.39  | 0.22  | 472 |
|                 | JM-43 | 6840.00 | Gray-brown mudstone      | 0.59  | 0.22  | 476 |
|                 | JM-44 | 6873.00 | Gray-brown mudstone      | 0.39  | 0.16  | 479 |
|                 | JM-45 | 6886.00 | Gray mudstone            | 0.4   | 0.27  | 438 |
|                 | JM-46 | 6932.00 | Gray mudstone            | 0.43  | 0.29  | 459 |
|                 | JM-47 | 6996.58 | Gray tuff                | 0.04  | 0.04  | 468 |
|                 | JM-48 | 6998.32 | Gray tuff                | 0.06  | 0.05  | 357 |
|                 | JM-49 | 7000.74 | Gray tuff                | 0.06  | 0.07  | 480 |
|                 | JM-50 | 7001.00 | Gray tuff                | 0.17  | 0.1   | 502 |
|                 | JM-51 | 7014.00 | Gray tuff                | 0.34  | 0.26  | 437 |
|                 | JM-52 | 7030.00 | Gray tuff                | 0.26  | 0.26  | 437 |
|                 | JM-53 | 7048.00 | Coal                     | 32.53 | 28.85 | 435 |
|                 | JM-54 | 7070.00 | Coal                     | 27.26 | 20.49 | 435 |

|       |         |                                |      |       |     |
|-------|---------|--------------------------------|------|-------|-----|
| JM-55 | 7090.00 | Gray tuff                      | 0.24 | 0.17  | 449 |
| JM-56 | 7114.00 | Gray tuff                      | 0.14 | 0.19  | 456 |
| JM-57 | 7153.00 | Gray tuff                      | 0.62 | 0.28  | 436 |
| JM-58 | 7168.00 | Gray-black tuff                | 0.61 | 0.25  | 453 |
| JM-59 | 7180.00 | Gray-black tuff                | 0.83 | 0.42  | 441 |
| JM-60 | 7201.00 | Gray-black tuff                | 0.64 | 0.25  | 447 |
| JM-61 | 7206.00 | Gray-black tuff                | 1.18 | 0.53  | 444 |
| JM-62 | 7216.00 | Gray tuff                      | 0.43 | 0.58  | 430 |
| JM-63 | 7245.00 | Gray tuffaceous mudstone       | 0.29 | 0.63  | 427 |
| JM-64 | 7298.00 | Gray tuff                      | 0.2  | 0.22  | 450 |
| JM-65 | 7323.00 | Gray tuff                      | 0.35 | 1.15  | 427 |
| JM-66 | 7361.00 | Gray-black tuffaceous mudstone | 4.64 | 10.18 | 430 |
| JM-67 | 7410.00 | Gray tuff                      | 0.41 | 0.35  | 437 |
| JM-68 | 7419.00 | Gray tuff                      | 0.2  | 0.16  | 460 |
| JM-69 | 7439.00 | Gray-black tuffaceous mudstone | 2.88 | 0.63  | 431 |
| JM-70 | 7468.00 | Gray-black tuffaceous mudstone | 0.61 | 0.23  | 446 |
| JM-71 | 7480.00 | Gray-black tuffaceous mudstone | 0.44 | 0.36  | 436 |
| JM-72 | 7489.00 | Gray tuff                      | 0.18 | 0.12  | 460 |
| JM-73 | 7493.00 | Gray tuff                      | 0.36 | 0.13  | 458 |

---

Table S2 Parameters of  $\delta^{13}\text{C}$  values of n-alkanes, Pr, Ph,  $\beta$ -carotene and chloroform extracts from MS1 wells of the Late Carboniferous-Early

## Triassic

| Strata                | Sample No. | $\beta$ - carotene / $\Sigma\text{C}_{12-35}$ | $\text{C}_{\text{max}}$ | $\text{CPI}_1^{\text{a}}$ | $\text{CPI}_2^{\text{b}}$ | $\text{Alk}_{\text{terr}}^{\text{c}}$ | $\text{LMW}/\text{HMW}^{\text{d}}$ | Pr/C17 | Ph/C18 | Pr/Ph | $\delta^{13}\text{C}$ |
|-----------------------|------------|-----------------------------------------------|-------------------------|---------------------------|---------------------------|---------------------------------------|------------------------------------|--------|--------|-------|-----------------------|
| <i>T<sub>1b</sub></i> | JM-1       | 0.05                                          | C17                     | 1.05                      | 1.17                      | 0.01                                  | 6.08                               | 0.26   | 0.37   | 0.67  | -29.58                |
|                       | JM-2       | 0.04                                          | C17                     | 1.05                      | 1.17                      | 0.01                                  | 6.09                               | 0.27   | 0.38   | 0.74  |                       |
|                       | JM-3       | 0.55                                          | C19                     | 1.06                      | 1.15                      | 0.06                                  | 1.39                               | 0.28   | 0.34   | 0.72  | -30.62                |
|                       | JM-4       | 0.51                                          | C19                     | 1.05                      | 1.15                      | 0.05                                  | 1.74                               | 0.28   | 0.36   | 0.72  | -30.81                |
|                       | JM-5       | 0.04                                          | C17                     | 1.06                      | 1.14                      | 0.01                                  | 8.26                               | 0.25   | 0.38   | 0.68  | -29.65                |
|                       | JM-6       | 0.60                                          | C19                     | 1.05                      | 1.19                      | 0.06                                  | 1.61                               | 0.27   | 0.34   | 0.70  |                       |
|                       | JM-7       |                                               | C17                     | 1.06                      | 1.17                      | 0.01                                  | 8.69                               | 0.25   | 0.41   | 0.70  | -29.28                |
|                       | JM-8       | 0.67                                          | C19                     | 1.06                      | 1.16                      | 0.05                                  | 1.59                               | 0.28   | 0.33   | 0.72  | -30.52                |
|                       | JM-9       | 0.90                                          | C19                     | 1.05                      | 1.19                      | 0.06                                  | 1.49                               | 0.28   | 0.35   | 0.72  |                       |
|                       | JM-10      | 0.79                                          | C19                     | 1.06                      | 1.19                      | 0.04                                  | 2.25                               | 0.24   | 0.38   | 0.62  | -29.50                |
|                       | JM-11      | 0.05                                          | C17                     | 1.05                      | 1.15                      | 0.01                                  | 8.47                               | 0.25   | 0.41   | 0.66  |                       |
|                       | JM-12      | 0.04                                          | C17                     | 1.05                      | 1.16                      | 0.01                                  | 8.15                               | 0.26   | 0.39   | 0.68  |                       |
|                       | JM-13      | 1.17                                          | C19                     | 1.06                      | 1.15                      | 0.06                                  | 1.64                               | 0.26   | 0.37   | 0.62  |                       |
|                       | JM-14      | 0.03                                          | C17                     | 1.06                      | 1.11                      | 0.01                                  | 11.43                              | 0.27   | 0.45   | 0.69  | -29.58                |
|                       | JM-15      | 0.93                                          | C19                     | 1.06                      | 1.18                      | 0.05                                  | 1.75                               | 0.25   | 0.37   | 0.63  | -30.11                |
|                       | JM-16      | 0.47                                          | C19                     | 1.06                      | 1.18                      | 0.04                                  | 2.01                               | 0.23   | 0.34   | 0.59  | -29.28                |
|                       | JM-17      |                                               | C25                     | 1.03                      | 1.15                      | 0.21                                  | 0.37                               | 0.19   | 0.26   | 0.57  | -32.17                |
|                       | JM-18      | 1.46                                          | C19                     | 1.05                      | 1.12                      | 0.07                                  | 1.44                               | 0.35   | 0.43   | 0.80  |                       |
|                       | JM-19      |                                               | C17                     | 1.03                      | 1.65                      | 0.00                                  | 4.65                               | 0.23   | 0.35   | 0.56  | -29.15                |
| <i>P<sub>3w</sub></i> | JM-20      | 0.80                                          | C19                     | 1.04                      | 1.20                      | 0.06                                  | 1.56                               | 0.26   | 0.35   | 0.63  | -29.66                |
| <i>P<sub>2w</sub></i> | JM-21      | 1.12                                          | C19                     | 1.07                      | 1.19                      | 0.07                                  | 1.18                               | 0.21   | 0.32   | 0.49  | -29.61                |

|                 |  |      |       |     |      |      |      |       |      |      |      |        |
|-----------------|--|------|-------|-----|------|------|------|-------|------|------|------|--------|
|                 |  |      | JM-22 | C19 | 1.03 | 1.25 | 0.01 | 2.02  | 0.23 | 0.35 | 0.50 | -28.47 |
|                 |  | 0.73 | JM-23 | C17 | 1.06 | 1.18 | 0.04 | 2.17  | 0.28 | 0.44 | 0.65 |        |
|                 |  | 0.67 | JM-24 | C19 | 1.06 | 1.16 | 0.04 | 2.01  | 0.26 | 0.40 | 0.64 | -29.90 |
|                 |  | 0.28 | JM-25 | C17 | 1.07 | 1.22 | 0.04 | 2.29  | 0.28 | 0.45 | 0.64 |        |
|                 |  | 0.49 | JM-26 | C17 | 1.08 | 1.15 | 0.03 | 3.54  | 0.29 | 0.51 | 0.70 | -30.14 |
|                 |  | 0.33 | JM-27 | C17 | 1.07 | 1.16 | 0.03 | 2.73  | 0.28 | 0.43 | 0.66 |        |
|                 |  |      | JM-28 | C17 | 1.08 | 1.19 | 0.01 | 11.64 | 0.29 | 0.51 | 0.74 | -30.05 |
|                 |  | 0.40 | JM-29 | C19 | 1.07 | 1.21 | 0.03 | 2.27  | 0.27 | 0.40 | 0.62 | -29.30 |
|                 |  |      | JM-30 | C17 | 1.06 | 1.22 | 0.01 | 8.87  | 0.30 | 0.53 | 0.66 |        |
|                 |  |      | JM-31 | C17 | 1.06 | 1.13 | 0.03 | 2.90  | 0.25 | 0.44 | 0.57 | -29.80 |
|                 |  |      | JM-32 | C17 | 1.07 | 1.19 | 0.02 | 4.19  | 0.28 | 0.44 | 0.69 | -29.13 |
|                 |  |      | JM-33 | C19 | 1.02 | 0.98 | 0.07 | 1.26  |      |      |      | -25.22 |
|                 |  |      | JM-34 | C19 | 1.02 | 1.07 | 0.07 | 1.15  |      |      |      | -23.93 |
|                 |  | 0.54 | JM-35 | C19 | 1.07 | 1.14 | 0.03 | 2.82  | 0.26 | 0.42 | 0.60 | -28.44 |
|                 |  | 0.31 | JM-36 | C17 | 1.08 | 1.16 | 0.01 | 7.80  | 0.31 | 0.54 | 0.74 | -29.54 |
|                 |  | 0.28 | JM-37 | C17 | 1.05 | 1.12 | 0.05 | 2.09  | 0.32 | 0.42 | 0.83 | -29.00 |
|                 |  |      | JM-38 | C19 | 1.10 | 0.82 | 0.06 | 1.57  | 0.29 | 0.43 | 0.67 | -28.44 |
|                 |  | 3.85 | JM-39 | C17 | 1.01 | 1.21 | 0.10 | 1.79  | 0.21 | 0.39 | 0.57 |        |
|                 |  |      | JM-40 | C17 | 1.03 | 1.09 | 0.08 | 1.32  | 0.27 | 0.43 | 0.67 | -28.32 |
|                 |  |      | JM-41 | C19 | 1.05 | 1.08 | 0.06 | 1.29  | 0.27 | 0.33 | 0.67 | -28.97 |
| P <sub>2x</sub> |  | 1.00 | JM-42 | C19 | 1.06 | 1.16 | 0.04 | 1.81  | 0.29 | 0.43 | 0.67 | -29.76 |
|                 |  | 0.65 | JM-43 | C17 | 1.05 | 1.18 | 0.03 | 2.36  | 0.25 | 0.40 | 0.64 | -28.77 |
|                 |  |      | JM-44 | C19 | 1.04 | 1.12 | 0.06 | 1.24  | 0.21 | 0.30 | 0.56 |        |
| C <sub>2t</sub> |  |      | JM-45 | C19 | 0.95 | 1.21 | 0.14 | 0.63  |      |      |      |        |

|  |      |  |     |      |      |      |      |      |      |      |        |
|--|------|--|-----|------|------|------|------|------|------|------|--------|
|  |      |  | C27 | 0.99 | 1.08 | 0.18 | 0.40 |      |      |      |        |
|  |      |  | C21 | 1.06 | 1.10 | 0.08 | 0.83 | 0.22 | 0.29 | 0.61 | -28.14 |
|  |      |  | C19 | 1.03 | 1.25 | 0.04 | 1.52 | 0.16 | 0.25 | 0.44 |        |
|  |      |  | C23 | 1.09 | 1.29 | 0.11 | 0.65 | 0.20 | 0.38 | 0.33 | -28.62 |
|  |      |  | C19 | 1.03 | 1.14 | 0.06 | 1.67 | 0.11 | 0.22 | 0.29 |        |
|  |      |  | C21 | 1.13 | 1.38 | 0.10 | 0.74 | 0.25 | 0.29 | 0.50 |        |
|  |      |  | C19 | 1.03 | 1.24 | 0.12 | 1.08 | 0.20 | 0.18 | 0.50 |        |
|  |      |  | C23 | 1.06 | 1.30 | 0.14 | 0.63 | 0.18 | 0.27 | 0.49 | -28.38 |
|  |      |  | C23 | 1.08 | 1.36 | 0.11 | 0.89 | 0.20 | 0.36 | 0.50 | -28.37 |
|  |      |  | C23 | 1.08 | 1.41 | 0.12 | 0.92 | 0.22 | 0.43 | 0.53 | -27.00 |
|  |      |  | C19 | 1.07 | 1.30 | 0.02 | 1.68 | 0.17 | 0.27 | 0.43 | -29.52 |
|  |      |  | C19 | 1.06 | 1.22 | 0.07 | 1.22 | 0.21 | 0.31 | 0.50 |        |
|  | 0.56 |  | C25 | 1.04 | 1.12 | 0.18 | 0.63 | 0.24 | 0.39 | 0.57 | -28.46 |
|  |      |  | C19 | 1.33 | 2.00 | 0.06 | 0.80 |      |      |      |        |
|  |      |  | C16 | 1.07 | 1.11 | 0.06 | 2.27 | 0.21 | 0.42 | 0.60 | -29.05 |
|  |      |  | C17 | 1.04 | 1.04 | 0.13 | 1.02 | 0.17 | 0.29 | 0.63 | -28.41 |
|  | 1.75 |  | C25 | 1.03 | 1.07 | 0.14 | 0.50 | 0.25 | 0.27 | 0.67 | -28.06 |
|  |      |  | C19 | 1.05 | 1.35 | 0.05 | 0.81 |      |      |      | -28.40 |
|  | 2.70 |  | C27 | 0.97 | 1.12 | 0.19 | 0.43 | 0.21 | 0.35 | 0.43 |        |

<sup>a</sup> CPI<sub>1</sub>:  $1/2[\Sigma C_{15-21}(\text{odd carbon})/\Sigma C_{14-20}(\text{even carbon}) + \Sigma C_{15-21}(\text{odd carbon})/$

$\Sigma C_{16-22}(\text{even carbon})]$

<sup>b</sup> CPI<sub>2</sub>:  $1/2[\Sigma C_{25-35}(\text{odd carbon})/\Sigma C_{24-34}(\text{even carbon}) + \Sigma C_{25-35}(\text{odd carbon})/$

$\Sigma C_{26-36}(\text{even carbon})]$



<sup>c</sup> Alkterr:  $(C_{27} + C_{29} + C_{31} + C_{33})/\Sigma C_{14-38}$

<sup>d</sup> LMW/HMW:  $\Sigma nC_{21-}/\Sigma nC_{22+}$

<sup>e</sup>  $\delta^{13}C = \delta^{13}C$  of chloroform extracts

–1

Table S3 Parameters of hopane and sterane in Late Carboniferous-Early Triassic of MS1 well

| Strata          | Sample No. | C31 $\alpha\beta$ -22S/<br>(S+R) | C32 $\alpha\beta$ -22S/<br>(S+R) | Gama. | C29/C30 | C35/C34 | Ts/Tm | C29 $\alpha\alpha\alpha$ -20S/<br>20(S+R) | C29 $\alpha\beta\beta$ /<br>( $\alpha\beta\beta + \alpha\alpha\alpha$ ) | C27 $\alpha\alpha\alpha$ 20R | C28 $\alpha\alpha\alpha$ 20R | C29 $\alpha\alpha\alpha$ 20R |
|-----------------|------------|----------------------------------|----------------------------------|-------|---------|---------|-------|-------------------------------------------|-------------------------------------------------------------------------|------------------------------|------------------------------|------------------------------|
|                 |            |                                  |                                  |       |         |         |       |                                           |                                                                         |                              |                              |                              |
| T <sub>1b</sub> | JM-1       | 0.60                             | 0.59                             | 0.32  | 0.67    | 0.55    | 0.48  | 0.44                                      | 0.51                                                                    | 25.61                        | 21.15                        | 53.24                        |
|                 | JM-2       | 0.61                             | 0.60                             | 0.31  | 0.59    | 0.57    | 0.79  | 0.44                                      | 0.53                                                                    | 27.50                        | 19.33                        | 53.17                        |
|                 | JM-3       | 0.59                             | 0.58                             | 0.42  | 0.78    | 0.83    | 0.52  | 0.46                                      | 0.56                                                                    | 32.89                        | 19.82                        | 47.29                        |
|                 | JM-4       | 0.57                             | 0.62                             | 0.43  | 0.56    | 0.90    | 0.49  | 0.50                                      | 0.57                                                                    | 34.27                        | 20.55                        | 45.19                        |
|                 | JM-5       | 0.59                             | 0.39                             | 0.35  | 0.80    | 0.71    | 0.65  | 0.45                                      | 0.53                                                                    | 29.76                        | 19.67                        | 50.57                        |
|                 | JM-6       | 0.60                             | 0.61                             | 0.83  | 0.82    | 0.94    | 0.22  | 0.43                                      | 0.47                                                                    | 11.37                        | 33.16                        | 55.47                        |
|                 | JM-7       | 0.65                             | 0.66                             | 0.21  | 0.42    | 0.33    | 0.74  | 0.48                                      | 0.56                                                                    | 21.16                        | 25.40                        | 53.45                        |
|                 | JM-8       | 0.59                             | 0.62                             | 0.41  | 0.63    | 0.89    | 0.54  | 0.50                                      | 0.55                                                                    | 30.10                        | 26.86                        | 43.04                        |
|                 | JM-9       | 0.58                             | 0.58                             | 0.45  | 0.60    | 0.81    | 0.54  | 0.49                                      | 0.52                                                                    | 24.51                        | 26.80                        | 48.70                        |
| P <sub>3w</sub> | JM-10      | 0.57                             | 0.58                             | 0.67  | 0.56    | 0.83    | 0.42  | 0.46                                      | 0.47                                                                    | 16.74                        | 32.35                        | 50.91                        |
|                 | JM-11      | 0.59                             | 0.41                             | 0.36  | 0.57    | 0.55    | 0.69  | 0.45                                      | 0.51                                                                    | 24.88                        | 25.81                        | 49.32                        |
|                 | JM-12      | 0.54                             | 0.56                             | 0.32  | 0.59    | 0.52    | 0.50  | 0.47                                      | 0.52                                                                    | 22.76                        | 25.70                        | 51.54                        |
|                 | JM-13      | 0.57                             | 0.61                             | 0.56  | 0.54    | 0.57    | 0.58  | 0.46                                      | 0.48                                                                    | 23.30                        | 26.57                        | 50.14                        |

|                 |       |      |      |      |      |      |      |      |      |       |       |       |
|-----------------|-------|------|------|------|------|------|------|------|------|-------|-------|-------|
|                 | JM-14 | 0.60 | 0.61 | 0.21 | 0.89 | 0.50 | 0.28 | 0.45 | 0.48 | 20.69 | 24.04 | 55.28 |
|                 | JM-15 | 0.58 | 0.57 | 0.55 | 0.57 | 0.97 | 0.54 | 0.48 | 0.51 | 20.92 | 30.51 | 48.57 |
|                 | JM-16 | 0.57 | 0.57 | 0.56 | 0.62 | 0.86 | 0.51 | 0.46 | 0.47 | 22.16 | 28.49 | 49.36 |
|                 | JM-17 | 0.59 | 0.57 | 0.58 | 0.55 | 0.87 | 0.45 | 0.42 | 0.47 | 21.76 | 26.70 | 51.54 |
|                 | JM-18 | 0.58 | 0.55 | 0.65 | 0.60 | 0.95 | 0.46 | 0.44 | 0.48 | 20.76 | 29.00 | 50.25 |
|                 | JM-19 | 0.53 | 0.57 | 0.60 | 0.63 | 0.76 | 0.49 | 0.49 | 0.53 | 27.40 | 29.50 | 43.11 |
|                 | JM-20 | 0.60 | 0.57 | 0.67 | 0.60 | 0.93 | 0.44 | 0.47 | 0.49 | 20.81 | 30.63 | 48.56 |
|                 | JM-21 | 0.56 | 0.55 | 0.59 | 0.55 | 0.99 | 0.49 | 0.48 | 0.50 | 22.47 | 29.76 | 47.77 |
|                 | JM-22 | 0.57 | 0.56 | 0.46 | 0.48 | 0.56 | 0.64 | 0.42 | 0.44 | 24.09 | 26.52 | 49.39 |
|                 | JM-23 | 0.57 | 0.59 | 0.55 | 0.75 | 0.80 | 0.41 | 0.45 | 0.50 | 24.25 | 26.57 | 49.18 |
|                 | JM-24 | 0.57 | 0.60 | 0.74 | 0.78 | 0.77 | 0.41 | 0.46 | 0.50 | 22.51 | 30.62 | 46.87 |
|                 | JM-25 | 0.58 | 0.68 | 0.44 | 0.78 | 0.71 | 0.47 | 0.47 | 0.52 | 30.47 | 25.26 | 44.27 |
|                 | JM-26 | 0.57 | 0.57 | 0.74 | 0.72 | 0.78 | 0.35 | 0.52 | 0.53 | 22.63 | 32.94 | 44.43 |
|                 | JM-27 | 0.58 | 0.57 | 0.51 | 0.68 | 0.79 | 0.43 | 0.47 | 0.48 | 22.66 | 27.56 | 49.78 |
|                 | JM-28 | 0.57 | 0.57 | 0.42 | 0.58 | 0.79 | 0.57 | 0.45 | 0.52 | 28.57 | 23.25 | 48.18 |
|                 | JM-29 | 0.64 | 0.60 | 0.47 | 0.68 | 1.28 | 0.64 | 0.50 | 0.50 | 29.70 | 24.84 | 45.46 |
|                 | JM-30 | 0.51 | 0.59 | 0.60 | 0.61 | 0.00 | 0.58 | 0.46 | 0.53 | 31.34 | 27.88 | 40.79 |
|                 | JM-31 | 0.60 | 0.60 | 0.52 | 0.65 | 0.81 | 0.53 | 0.44 | 0.51 | 27.32 | 24.73 | 47.95 |
|                 | JM-32 | 0.57 | 0.55 | 0.49 | 0.72 | 0.90 | 0.55 | 0.48 | 0.51 | 29.53 | 25.86 | 44.61 |
|                 | JM-33 | 0.59 | 0.56 | 0.94 | 0.66 | 0.83 | 0.55 | 0.45 | 0.52 | 25.62 | 26.72 | 47.66 |
|                 | JM-34 | 0.57 | 0.56 | 1.30 | 0.70 | 0.64 | 0.35 | 0.49 | 0.50 | 27.44 | 27.41 | 45.15 |
|                 | JM-35 | 0.57 | 0.58 | 0.47 | 0.70 | 0.75 | 0.48 | 0.46 | 0.49 | 27.63 | 24.57 | 47.79 |
|                 | JM-36 | 0.60 | 0.60 | 0.51 | 0.51 | 0.73 | 0.70 | 0.46 | 0.52 | 27.48 | 25.79 | 46.73 |
| P <sub>2w</sub> | JM-37 | 0.59 | 0.56 | 0.50 | 0.62 | 0.87 | 0.60 | 0.44 | 0.53 | 30.41 | 24.14 | 45.45 |

|          |       |      |      |      |      |      |      |      |      |       |       |       |
|----------|-------|------|------|------|------|------|------|------|------|-------|-------|-------|
|          | JM-38 | 0.59 | 0.61 | 0.56 | 0.64 | 0.81 | 0.56 | 0.45 | 0.51 | 26.60 | 24.16 | 49.24 |
|          | JM-39 | 0.64 | 0.60 | 0.61 | 0.43 | 0.31 | 0.65 | 0.42 | 0.47 | 34.92 | 24.01 | 41.07 |
|          | JM-40 | 0.59 | 0.59 | 0.51 | 0.59 | 0.69 | 0.91 | 0.49 | 0.50 | 31.43 | 22.70 | 45.87 |
|          | JM-41 | 0.58 | 0.61 | 0.61 | 0.76 | 0.89 | 0.49 | 0.49 | 0.50 | 21.92 | 30.91 | 47.16 |
| $P_{2x}$ | JM-42 | 0.59 | 0.56 | 0.73 | 0.58 | 0.86 | 0.33 | 0.43 | 0.51 | 17.95 | 29.30 | 52.75 |
|          | JM-43 | 0.58 | 0.56 | 0.53 | 0.58 | 0.76 | 0.60 | 0.45 | 0.49 | 29.60 | 26.91 | 43.50 |
|          | JM-44 | 0.58 | 0.59 | 0.58 | 0.59 | 0.68 | 0.80 | 0.49 | 0.49 | 32.31 | 26.54 | 41.15 |
|          | JM-45 | 0.61 | 0.63 | 0.63 | 0.64 | 0.54 | 0.80 | 0.48 | 0.46 | 28.11 | 25.12 | 46.77 |
|          | JM-46 | 0.60 | 0.58 | 0.64 | 0.61 | 0.77 | 0.74 | 0.48 | 0.44 | 28.24 | 26.66 | 45.10 |
|          | JM-47 | 0.57 | 0.56 | 0.63 | 0.57 | 0.78 | 0.71 | 0.47 | 0.51 | 32.39 | 24.66 | 42.95 |
|          | JM-48 | 0.55 | 0.55 | 0.57 | 0.54 | 0.75 | 0.76 | 0.44 | 0.47 | 30.51 | 23.05 | 46.44 |
|          | JM-49 | 0.61 | 0.60 | 0.73 | 0.51 | 0.66 | 1.03 | 0.48 | 0.46 | 33.50 | 25.57 | 40.93 |
|          | JM-50 | 0.60 | 0.59 | 0.95 | 0.50 | 0.60 | 0.88 | 0.41 | 0.41 | 37.70 | 22.84 | 39.46 |
|          | JM-51 | 0.61 | 0.61 | 0.69 | 0.61 | 0.56 | 0.88 | 0.45 | 0.43 | 36.57 | 23.34 | 40.09 |
|          | JM-52 | 0.55 | 0.56 | 0.86 | 0.43 | 0.52 | 0.78 | 0.42 | 0.46 | 25.81 | 25.75 | 48.43 |
|          | JM-53 | 0.50 | 0.49 | 0.38 | 0.54 | 0.84 | 0.43 | 0.36 | 0.44 | 26.47 | 23.68 | 49.85 |
|          | JM-54 | 0.38 | 0.46 | 0.29 | 0.52 | 0.76 | 0.27 | 0.19 | 0.35 | 18.25 | 18.21 | 63.54 |
|          | JM-55 | 0.41 | 0.45 | 0.28 | 0.56 | 0.66 | 0.30 | 0.20 | 0.37 | 20.00 | 17.76 | 62.24 |
|          | JM-56 | 0.59 | 0.57 | 0.50 | 0.68 | 0.92 | 0.54 | 0.41 | 0.50 | 30.30 | 21.00 | 48.70 |
|          | JM-57 | 0.61 | 0.55 | 0.56 | 0.70 | 0.75 | 0.55 | 0.42 | 0.44 | 39.27 | 23.58 | 37.14 |
|          | JM-58 | 0.56 | 0.57 | 0.65 | 0.41 | 0.59 | 0.90 | 0.32 | 0.36 | 38.39 | 22.77 | 38.84 |
|          | JM-60 | 0.56 | 0.57 | 2.47 | 0.34 |      | 1.18 | 0.32 | 0.23 | 25.63 | 27.67 | 46.70 |
|          | JM-62 | 0.61 | 0.61 | 0.71 | 0.71 | 0.56 | 0.58 | 0.48 | 0.47 | 34.84 | 25.40 | 39.76 |
| $C_{2t}$ | JM-67 | 0.62 | 0.62 | 0.62 | 0.57 | 0.97 | 0.70 | 0.42 | 0.39 | 24.43 | 21.27 | 54.30 |

|  |       |      |      |      |      |      |      |      |      |       |       |       |
|--|-------|------|------|------|------|------|------|------|------|-------|-------|-------|
|  | JM-69 | 0.54 | 0.50 | 0.90 | 0.50 | 0.55 | 0.58 | 0.41 | 0.46 | 27.41 | 23.30 | 49.28 |
|  | JM-71 | 0.64 | 0.63 | 0.68 | 0.66 | 0.65 | 0.78 | 0.46 | 0.46 | 22.29 | 24.32 | 53.39 |
|  | JM-73 | 0.67 | 0.62 | 0.69 | 0.72 | 0.68 | 0.57 | 0.44 | 0.44 | 18.56 | 23.46 | 57.98 |
